# Supplementary material for: The existence of a strongly bonded layer in associating liquids within silica pores – a spectral and molecular dynamics study
Source: Royal Society of Chemistry journal article supplement (doi:10.1039/d3nr06187f), 2024-01-01
Supplement: d3nr06187f1.pdf [file d3nr06187f1.pdf]

## Supplementary Information for

### The Existence of a Strongly Bonded Layer in Associating Liquids within Silica Pores - the Spectral and Molecular Dynamics Study

Natalia Soszka<sup>a</sup>, Magdalena Tarnacka<sup>b\*</sup>, Barbara Hachuła<sup>a</sup>, Patryk Włodarczyk<sup>c</sup>,  
Roman Wrzalik<sup>b</sup>, Marian Paluch<sup>b</sup>, Marek Hreczka<sup>c,d</sup>, Kamil Kamiński<sup>b</sup>

<sup>a</sup> Institute of Chemistry, University of Silesia in Katowice, Szkolna 9, 40-006 Katowice, Poland

<sup>b</sup> August Chelkowski Institute of Physics, University of Silesia in Katowice, 75 Pułku Piechoty 1a, 41-500 Chorzów, Poland

<sup>c</sup> Lukasiewicz Research Network – Institute of Non-Ferrous Metals, ul. Sowinskiego 5, 44-100 Gliwice, Poland

<sup>d</sup> Department of Mechatronics, Silesian University of Technology, Akademicka 10A St., 44-100, Gliwice, Poland

\*Corresponding author: magdalena.tarnacka@us.edu.pl

#### This Supplementary Information file includes:

|                                                                                                                                                                                                                                                                                                                                                                                                            |   |
|------------------------------------------------------------------------------------------------------------------------------------------------------------------------------------------------------------------------------------------------------------------------------------------------------------------------------------------------------------------------------------------------------------|---|
| <b>Fig. S1.</b> The schematic structure of cross-section (a) and the top (b) of applied silica mesopore templates.....                                                                                                                                                                                                                                                                                     | 2 |
| <b>Fig. S2.</b> The normalized infrared spectra of bulk MAs in the frequency region 3700 – 3100 cm <sup>-1</sup> showing the stretching vibration of the OH groups.....                                                                                                                                                                                                                                    | 2 |
| <b>Fig. S3.</b> IR spectra of (a) 2Ph1E and (b) 3Ph1P infiltrated into native silica mesopores ( $d = 4$ nm) at 297 K in the spectral regions 3800 – 2500 cm <sup>-1</sup> and 1800 – 1300 cm <sup>-1</sup> . ....                                                                                                                                                                                         | 3 |
| <b>Fig. S4.</b> Infrared spectra of the bulk 2Ph1E (a) and 3Ph1P (b) together with those obtained for PhAs infiltrated into native and silanized silica templates of $d = 4$ nm measured at $T = 297$ K in the spectral region 3800 – 2600 cm <sup>-1</sup> . The spectra were normalized to the OH stretching vibration peak. Additionally, a spectrum of empty silanized silica templates was added..... | 4 |
| <b>Fig. S5.</b> FTIR spectra of bulk 2Ph1E (a) and bulk 3Ph1P (b) at $t = 0$ min and $t = 60$ min in the frequency region 3800 – 3000 cm <sup>-1</sup> . ....                                                                                                                                                                                                                                              | 4 |
| <b>Fig. S6.</b> The comparison of FTIR spectra recorded in the spectral region 3800 – 2600 cm <sup>-1</sup> for (a) 2Ph1E and (b) 3Ph1P of the bulk and infiltrated into native silica mesopores of $d = 8$ nm at 298 K and also before and after the evaporation. For comparison, the FTIR spectrum of “empty” native silica membrane was also added. ....                                                | 5 |
| <b>Fig. S7.</b> FTIR spectra of 2Ph1E infiltrated into native (a,b) and silanized (c,d) silica mesopores ( $d = 4$ nm) at $t = 0$ min and $t = 60$ min in the frequency region (a,c) 3720 – 2600 cm <sup>-1</sup> and (b,d) 3130 – 2990 cm <sup>-1</sup> ( $T = 353$ K). ....                                                                                                                              | 5 |
| <b>Fig. S8.</b> FTIR spectra of 3Ph1P infiltrated into native (a,b) and silanized (c,d) silica mesopores ( $d = 4$ nm) at $t = 0$ min and $t = 60$ min in the frequency region (a,c) 3720 – 2600 cm <sup>-1</sup> and (b,d) 3130 – 2990 cm <sup>-1</sup> ( $T = 363$ K). ....                                                                                                                              | 6 |
| <b>Fig. S9.</b> Raman spectra of bulk 2Ph1E (black), incorporated into silica membrane before annealing (red) and after annealing (blue) presented at 297 K at the frequency regions (a) 3300 – 2700 cm <sup>-1</sup> and (b) 1800 – 500 cm <sup>-1</sup> . ....                                                                                                                                           | 6 |
| <b>Fig. S10.</b> The comparison of FTIR spectra recorded in the spectral region 3800 – 2600 cm <sup>-1</sup> at $T = 297$ K of the bulk 2Ph1E, infiltrated into silanized silica mesopores of $d = 4$ nm before and after the evaporation, and 2Ph1E within the 0.1M solution of CCl <sub>4</sub> . For comparison, the FTIR spectrum of                                                                   |   |

“empty” silanized silica membrane was also added. Data for the bulk samples measured within 0.1M solution of  $\text{CCl}_4$  were taken from Ref. (1)..... 7

**Fig. S11.** Panel A: Distribution of 2Ph1E molecules in xy plane of 8 nm pore. From the left side, systems with 100%, 75%, 50%, and 25% of initial pore density have been shown. Panel B: density of 2Ph1E molecules in the pore for the equilibrating NPT system. Panel C: Existence of strongly bonded alcohol layer at the silica interface for both studied pores with 4 and 8 nm diameter, respectively. .... 8

**Fig. S12.** Histograms comparing formation of clusters in 2Ph1E and 3Ph1P in mesopores with  $d = 4$  nm with the 100% and 50% alcohol densities..... 8

**Table S1.** Average densities of alcohols, and the amounts of free OH groups in the studied systems, i.e. in bulk and pores with diameters of 4 nm and 8 nm..... 9

**References:** ..... 9

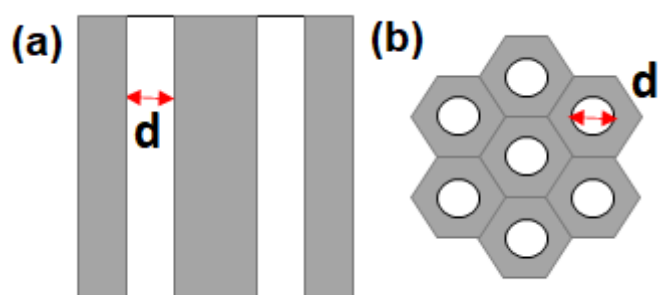

**Fig. S1.** The schematic structure of cross-section (a) and the top (b) of applied silica mesopore templates.

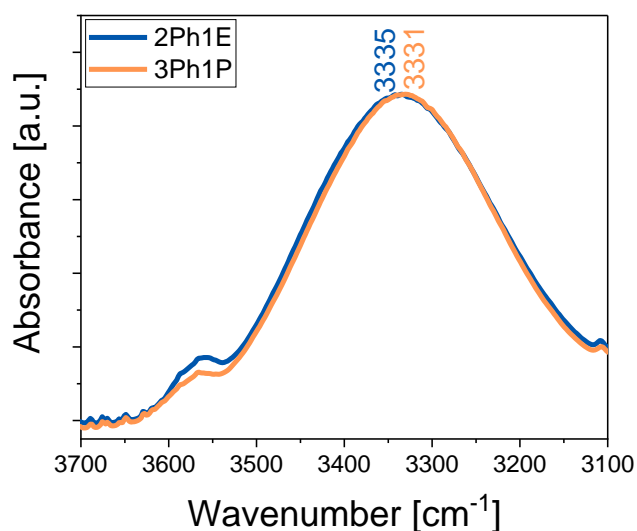

**Fig. S2.** The normalized infrared spectra of bulk MAs in the frequency region 3700 – 3100  $\text{cm}^{-1}$  showing the stretching vibration of the OH groups.

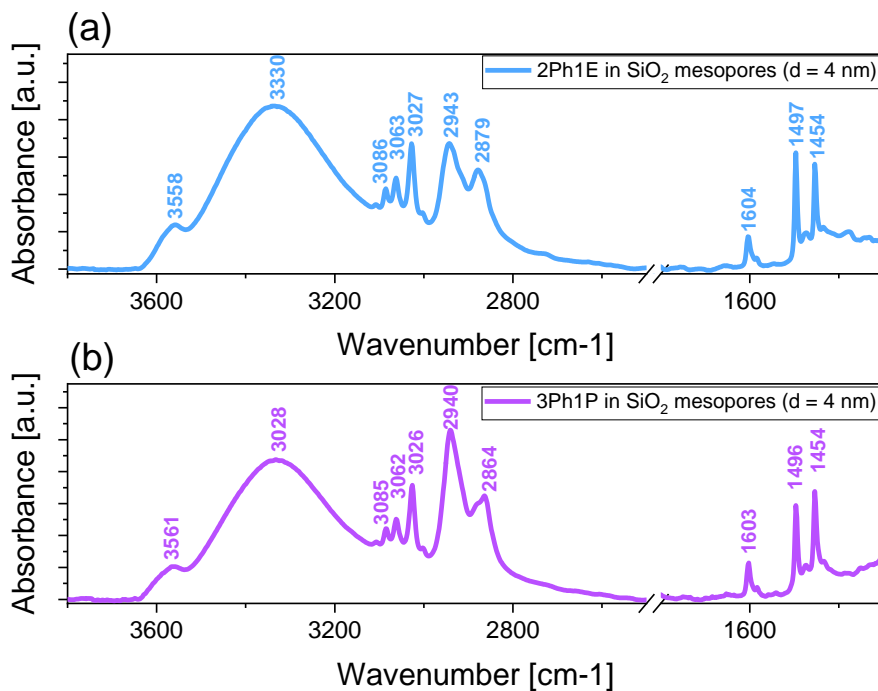

**Fig. S3.** IR spectra of (a) 2Ph1E and (b) 3Ph1P infiltrated into native silica mesopores ( $d = 4$  nm) at 297 K in the spectral regions  $3800 - 2500$   $\text{cm}^{-1}$  and  $1800 - 1300$   $\text{cm}^{-1}$ .

The vibrational analysis of 2Ph1E and 3Ph1P was performed based on the reported theoretical spectra in the literature. **Fig. S3** shows IR spectra of 2Ph1E and 3Ph1P infiltrated into silica nanopores measured at 293 K in the frequency range  $3800\text{-}1300$   $\text{cm}^{-1}$ , respectively. The spectra are shown only to  $1300$   $\text{cm}^{-1}$  because, in the lower wavenumber region, there was an oversaturation caused by the silica matrix. In the upper-frequency region, one can observe the bands corresponding to the stretching vibration of hydroxyl groups ( $3650 - 3100$   $\text{cm}^{-1}$ ). The absorption signals in the region  $3100 - 3000$   $\text{cm}^{-1}$  are assigned to the aromatic C-H stretching vibrations, and the peaks related to the asymmetric and symmetric aliphatic C-H stretching vibrations lie between  $3000 - 2800$   $\text{cm}^{-1}$ . A sharp band originating at  $1604$   $\text{cm}^{-1}$  (2Ph1P) and  $1603$   $\text{cm}^{-1}$  is due to ring deformation vibration. Additionally, for 2Ph1P, the visible peak located at  $1497$   $\text{cm}^{-1}$  is related to the mixed C-H ring bending and ring deformation vibrations. For 3Ph1P, the band observed at  $1496$   $\text{cm}^{-1}$  is characterized by the CH<sub>2</sub> scissoring vibration. A peak of small intensity at  $1474$   $\text{cm}^{-1}$  corresponds to the CH<sub>2</sub> scissoring vibrations (2Ph1P). Absorption signals occurring at  $1454$   $\text{cm}^{-1}$  in both alcohols are due to the mixed aromatic C-H ring bending vibrations, ring deformations, and CH<sub>2</sub> scissoring vibrations for 2Ph1P, and the CH<sub>2</sub> wagging vibration mixed with the OH in-plane deformation for 3Ph1P.

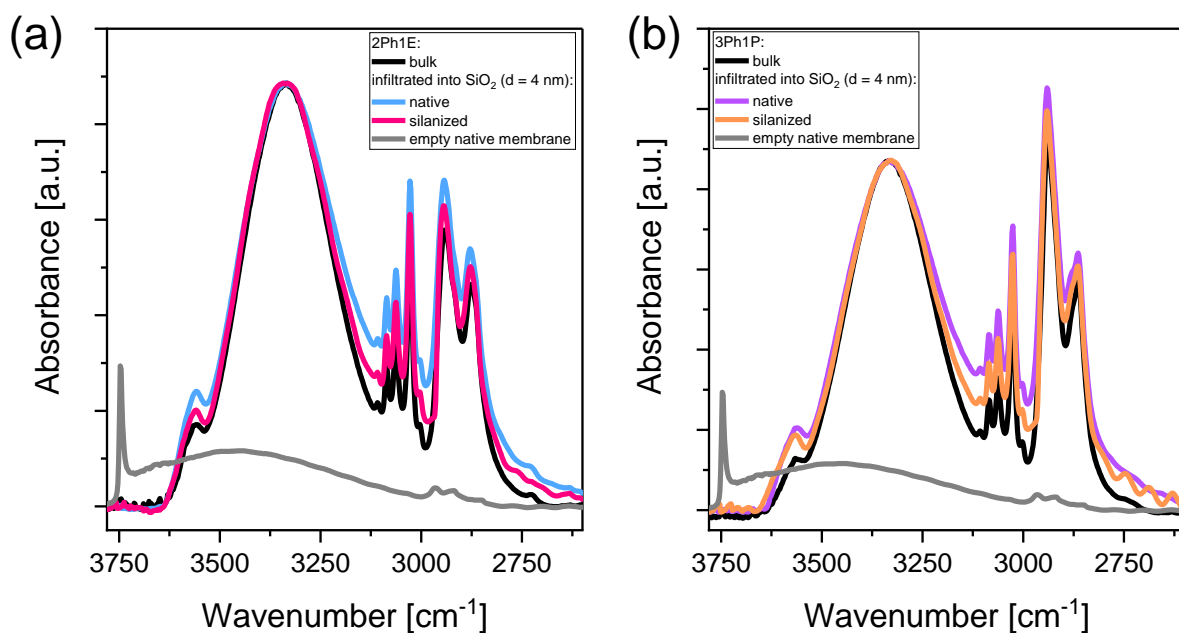

**Fig. S4.** Infrared spectra of the bulk 2Ph1E (a) and 3Ph1P (b) together with those obtained for PhAs infiltrated into native and silanized silica templates of  $d = 4$  nm measured at  $T = 297$  K in the spectral region  $3800 - 2600$   $\text{cm}^{-1}$ . The spectra were normalized to the OH stretching vibration peak. Additionally, a spectrum of empty silanized silica templates was added.

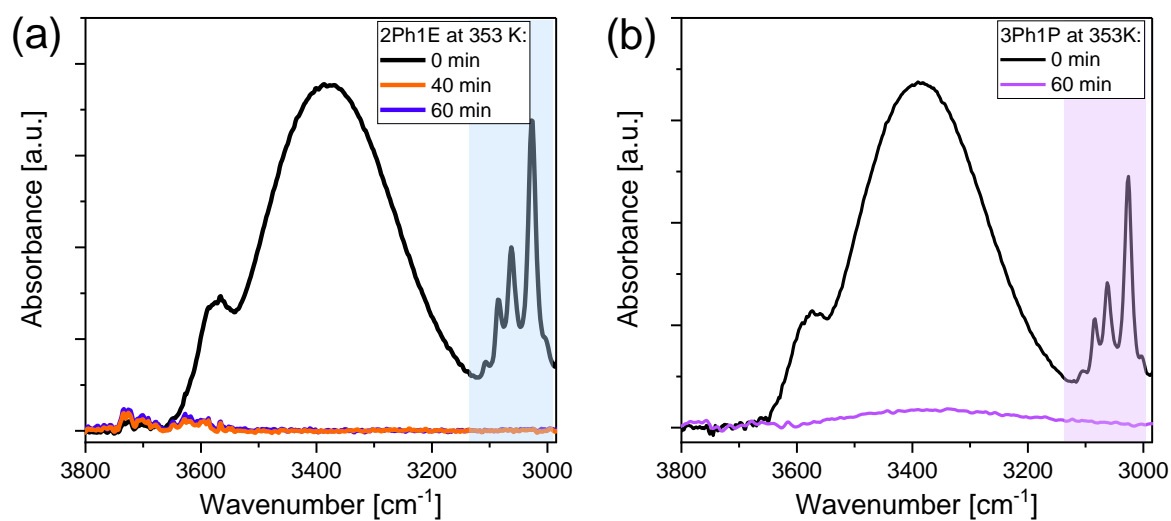

**Fig. S5.** FTIR spectra of bulk 2Ph1E (a) and bulk 3Ph1P (b) at  $t = 0$  min and  $t = 60$  min in the frequency region  $3800 - 3000$   $\text{cm}^{-1}$ .

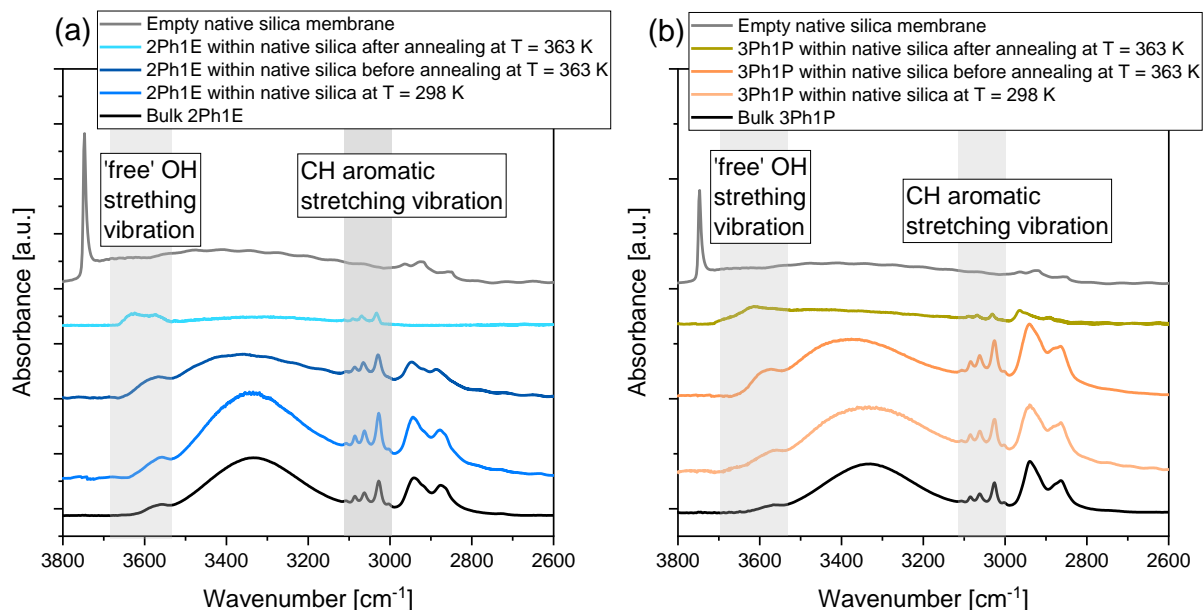

**Fig. S6.** The comparison of FTIR spectra recorded in the spectral region  $3800 - 2600 \text{ cm}^{-1}$  for (a) 2Ph1E and (b) 3Ph1P of the bulk and infiltrated into native silica mesopores of  $d = 8 \text{ nm}$  at 298 K and also before and after the evaporation. For comparison, the FTIR spectrum of “empty” native silica membrane was also added.

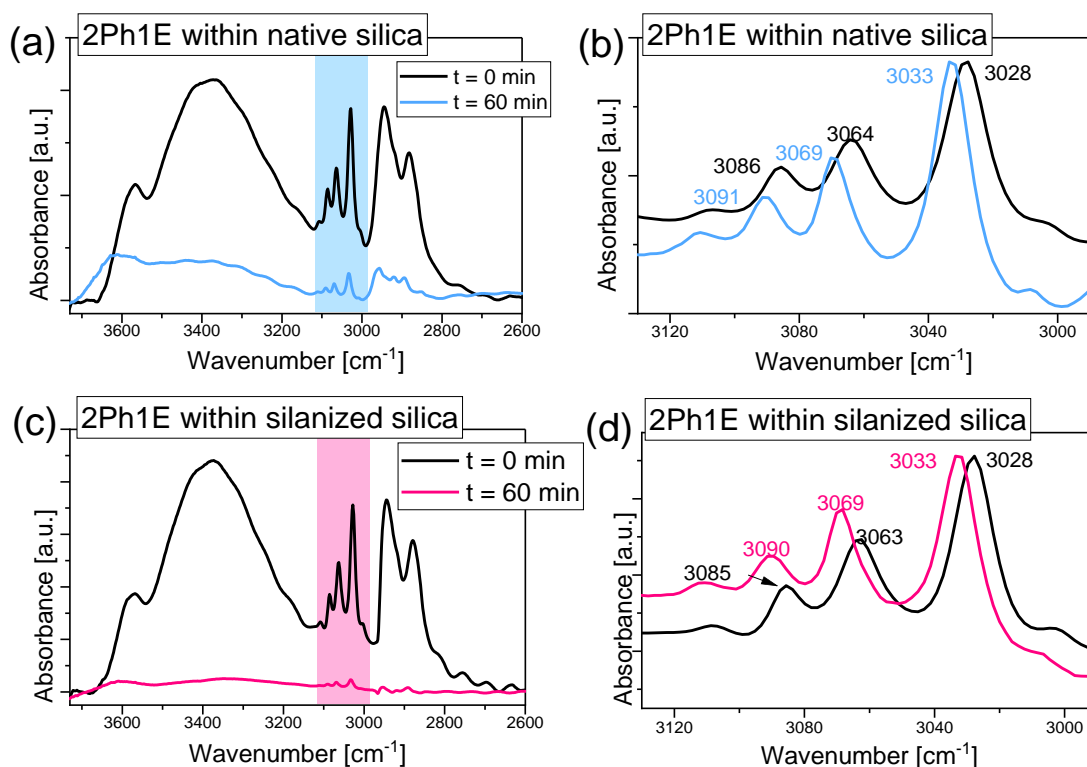

**Fig. S7.** FTIR spectra of 2Ph1E infiltrated into native (a,b) and silanized (c,d) silica mesopores ( $d = 4 \text{ nm}$ ) at  $t = 0 \text{ min}$  and  $t = 60 \text{ min}$  in the frequency region (a,c)  $3720 - 2600 \text{ cm}^{-1}$  and (b,d)  $3130 - 2990 \text{ cm}^{-1}$  ( $T = 353 \text{ K}$ ).

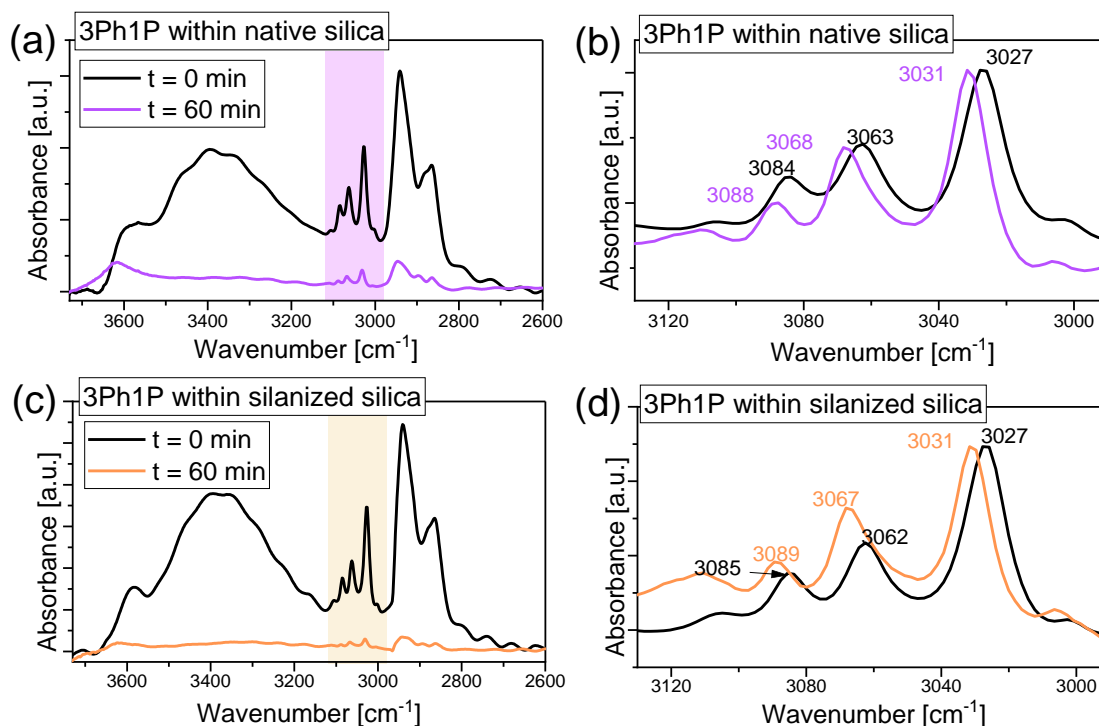

**Fig. S8.** FTIR spectra of 3Ph1P infiltrated into native (a,b) and silanized (c,d) silica mesopores ( $d = 4$  nm) at  $t = 0$  min and  $t = 60$  min in the frequency region (a,c)  $3720 - 2600$  cm<sup>-1</sup> and (b,d)  $3130 - 2990$  cm<sup>-1</sup> ( $T = 363$  K).

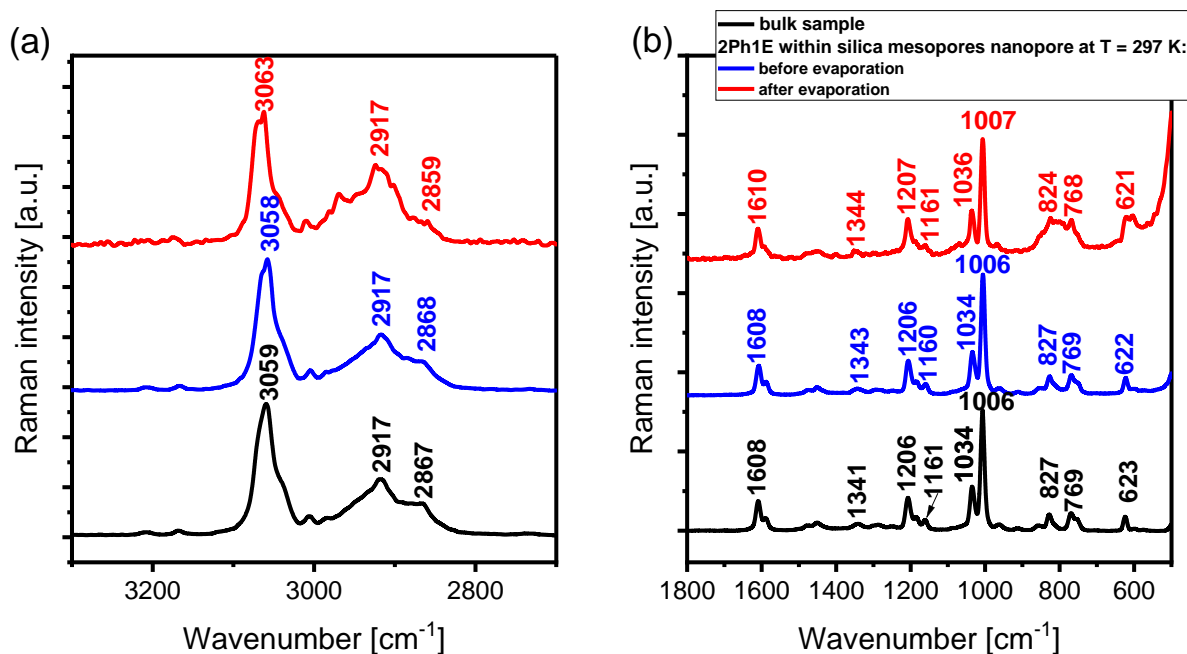

**Fig. S9.** Raman spectra of bulk 2Ph1E (black), incorporated into silica membrane before annealing (red) and after annealing (blue) presented at 297 K at the frequency regions (a)  $3300 - 2700$  cm<sup>-1</sup> and (b)  $1800 - 500$  cm<sup>-1</sup>.

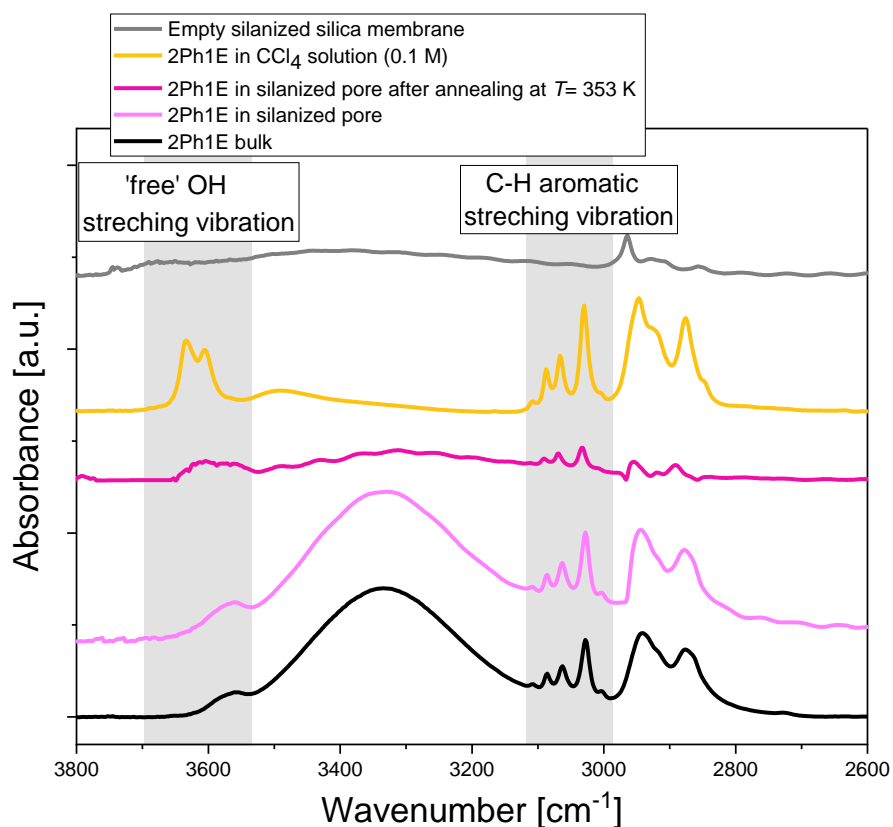

**Fig. S10.** The comparison of FTIR spectra recorded in the spectral region 3800 – 2600  $\text{cm}^{-1}$  at  $T = 297$  K of the bulk 2Ph1E, infiltrated into silanized silica mesopores of  $d = 4$  nm before and after the evaporation, and 2Ph1E within the 0.1M solution of  $\text{CCl}_4$ . For comparison, the FTIR spectrum of “empty” silanized silica membrane was also added. Data for the bulk samples measured within 0.1M solution of  $\text{CCl}_4$  were taken from Ref. (1).

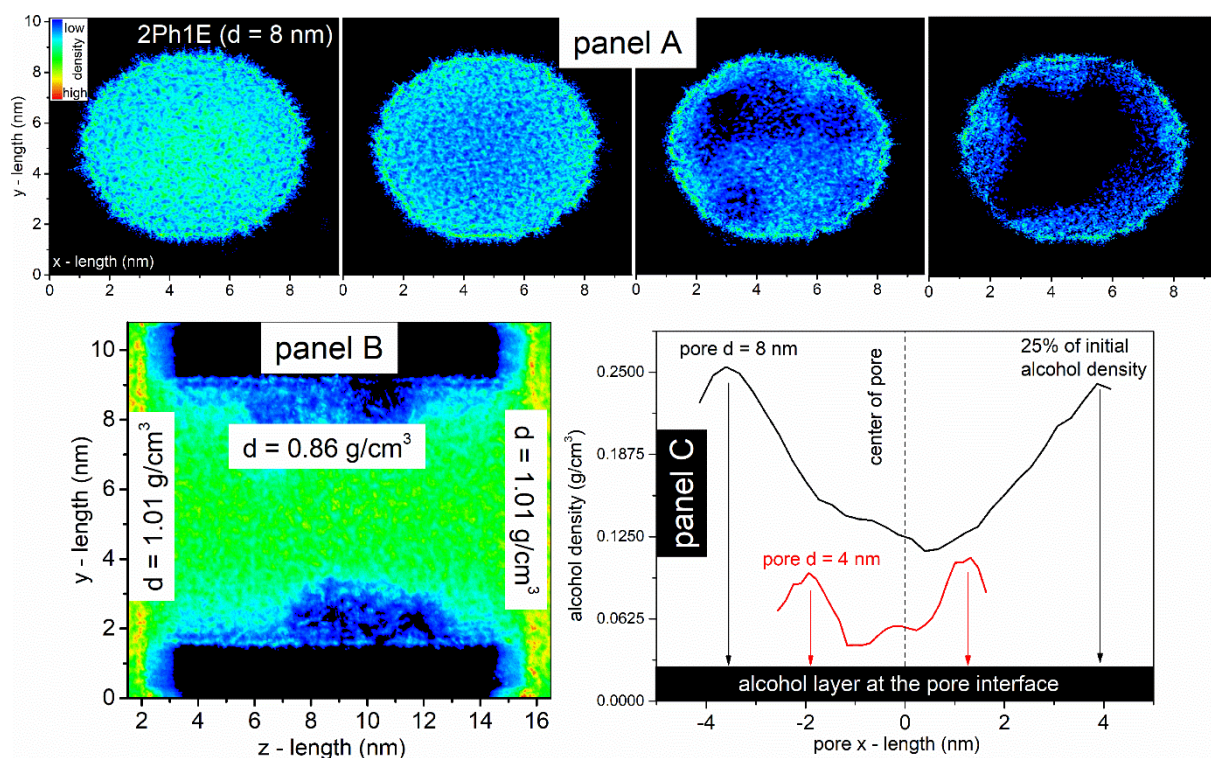

**Fig. S11.** Panel A: Distribution of 2Ph1E molecules in xy plane of 8 nm pore. From the left side, systems with 100%, 75%, 50%, and 25% of initial pore density have been shown. Panel B: density of 2Ph1E molecules in the pore for the equilibrating NPT system. Panel C: Existence of strongly bonded alcohol layer at the silica interface for both studied pores with 4 and 8 nm diameter, respectively.

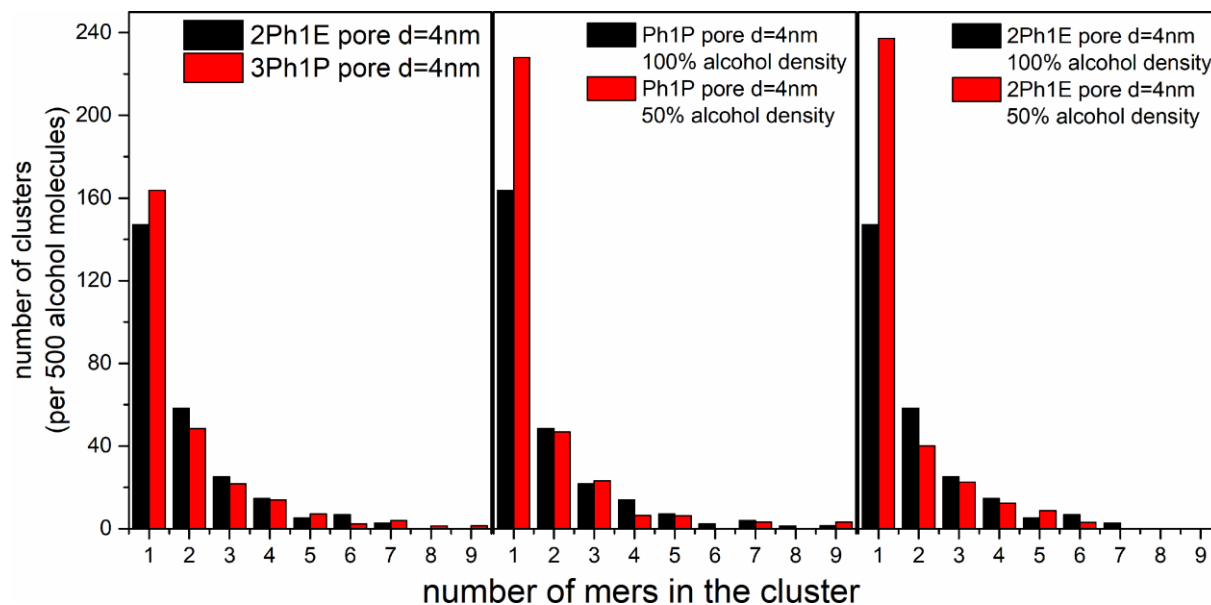

**Fig. S12.** Histograms comparing formation of clusters in 2Ph1E and 3Ph1P in mesopores with  $d = 4$  nm with the 100% and 50% alcohol densities.



**Table S1.** Average densities of alcohols, and the amounts of free OH groups in the studied systems, i.e. in bulk and pores with diameters of 4 nm and 8 nm.

| Type                            | Alcohol density (g/cm <sup>3</sup> ) | Free OH groups (in whole system) (%) | Free OH groups in the pore core region (in alcohol) (%) |
|---------------------------------|--------------------------------------|--------------------------------------|---------------------------------------------------------|
| 2Ph1E bulk                      | 1.01                                 | 14.9                                 | 14.9                                                    |
| 2Ph1E, $d = 4$ nm, 100% density | 0.67                                 | 6.9                                  | 29.1                                                    |
| 2Ph1E, $d = 4$ nm, 50% density  | 0.33                                 | 14.3                                 | 47.5                                                    |
| 2Ph1E, $d = 8$ nm, 100% density | 0.86                                 | 10.6                                 | 19.3                                                    |
| 2Ph1E, $d = 8$ nm, 50% density  | 0.43                                 | 18.3                                 | 27.5                                                    |
| 3Ph1P bulk                      | 0.98                                 | 20.6                                 | 20.6                                                    |
| 3Ph1P, $d = 4$ nm, 100% density | 0.66                                 | 22.2                                 | 32.7                                                    |
| 3Ph1P, $d = 4$ nm, 50% density  | 0.33                                 | 30.3                                 | 45.2                                                    |

## References:

1. N. Soszka, B. Hachuła, M. Tarnacka, E. Kamińska, J. Grelska, K. Jurkiewicz, M. Geppert-Rybczyńska, R. Wrzalik, K. Grzybowska, S. Pawlus, M. Paluch, K. Kamiński, The impact of the length of alkyl chain on the behavior of benzyl alcohol homologues—the interplay between dispersive and hydrogen bond interactions. *Phys. Chem. Chem. Phys.* **23**, 23796–23807 (2021).
